# Supplementary material
Source: PubMed Central journal article supplement (PMC6030467)
Supplement: NIHMS962873-supplement-1.pdf [file NIHMS962873-supplement-1.pdf]

Figure S1

A

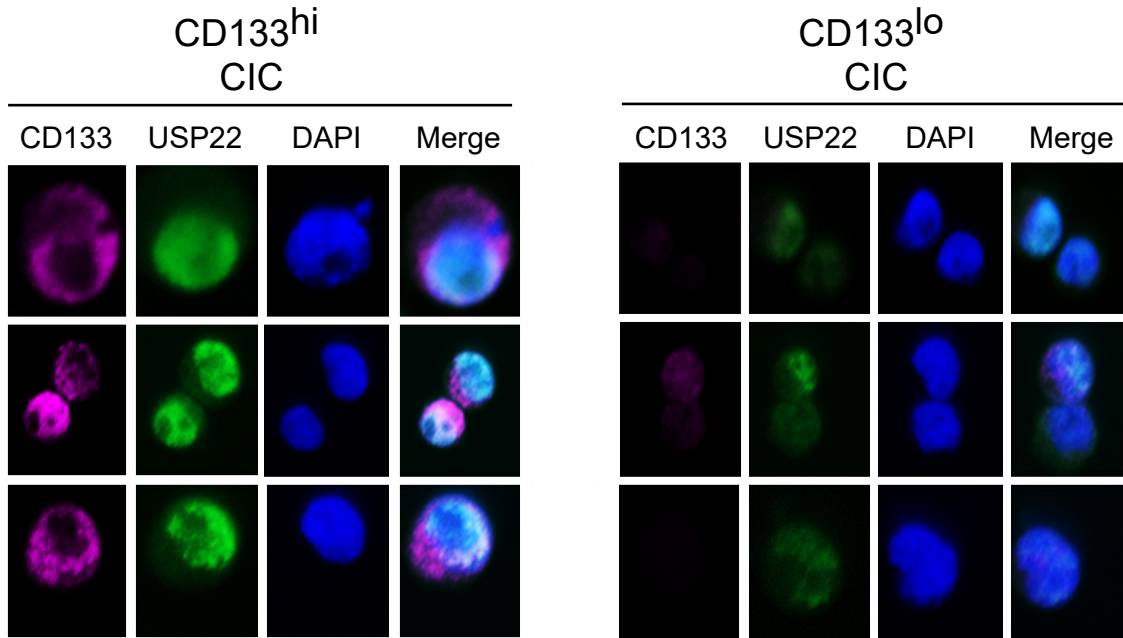

B

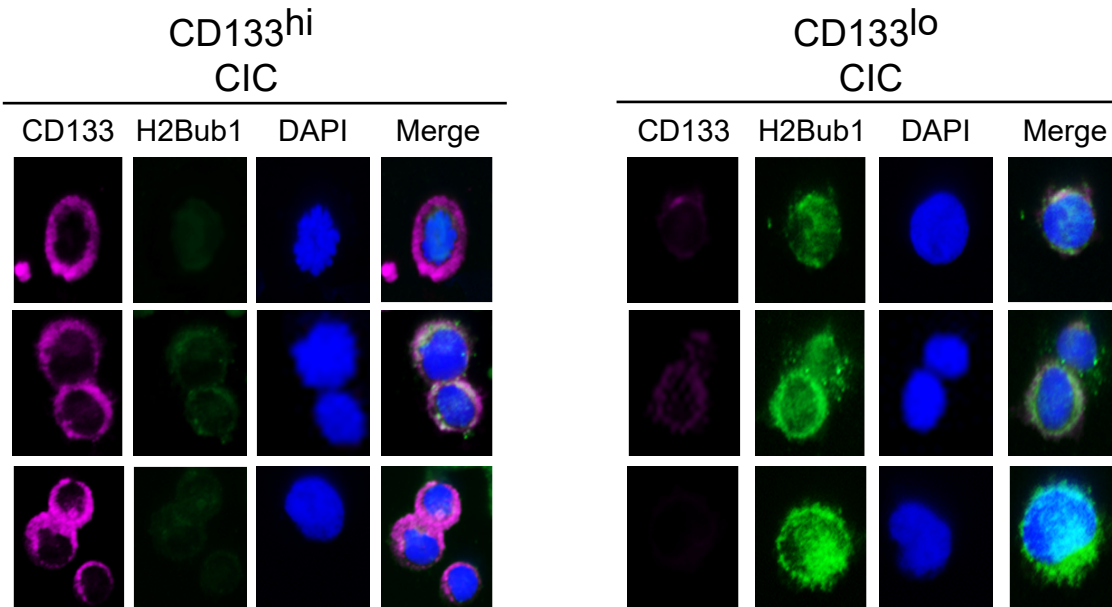

**Figure S1:** The purple labeled CD133 protein was found in cell membrane, and green labeled USP22 and H2Bub1 were expressed in cell nucleus. The expression of USP22 was markedly higher in cells with high expression of CD133 (CD133<sup>hi</sup> cells) (Figure S2A, left panel), while the expression of H2Bub1 displayed an opposite trend of low expression in CD133<sup>hi</sup> cells (Figure S2B, left panel). In cells with low expression of CD133 (CD133<sup>lo</sup> cells), the expression of UPS22 was also decreased (Figure S2A, right panel), while the expression of H2Bub1 was increased (Figure S2B, right panel).
