# Supplementary material
Source: PubMed Central journal article supplement (PMC6030467)
Supplement: NIHMS962873-supplement-2.pdf [file NIHMS962873-supplement-2.pdf]

Figure S2

A

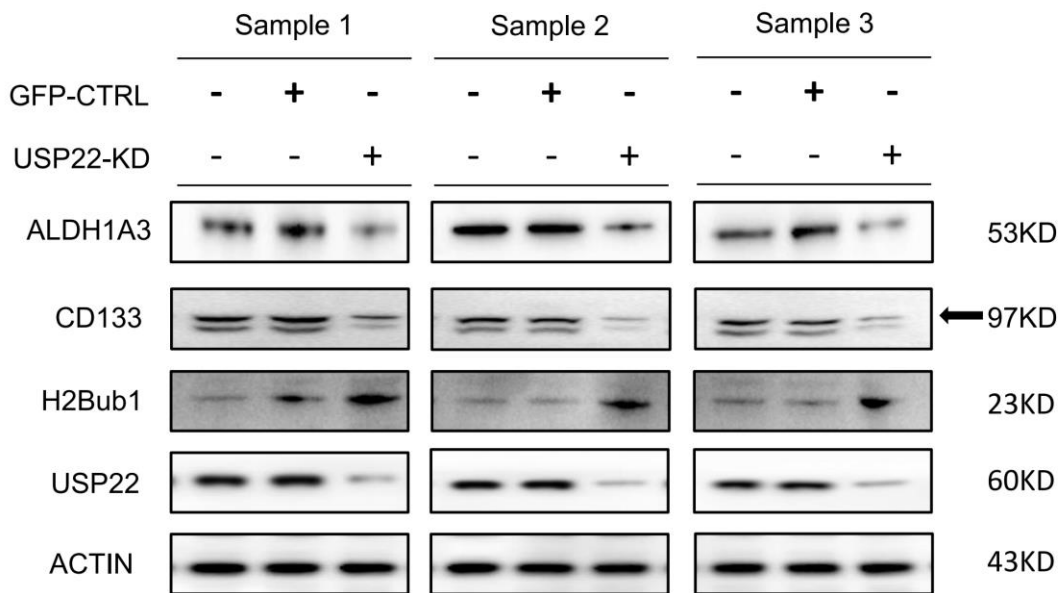

**A:** With another USP22-shRNA, we can see the results were the same as the Figure 2B left panel. Compared to GFP-CTRL CICs, USP22 protein was markedly decreased in USP22-KD cells, and concurrently, CD133 and ALDH1A3 were highly downregulated and H2Bub1 was moderately increased in all three cells.

B

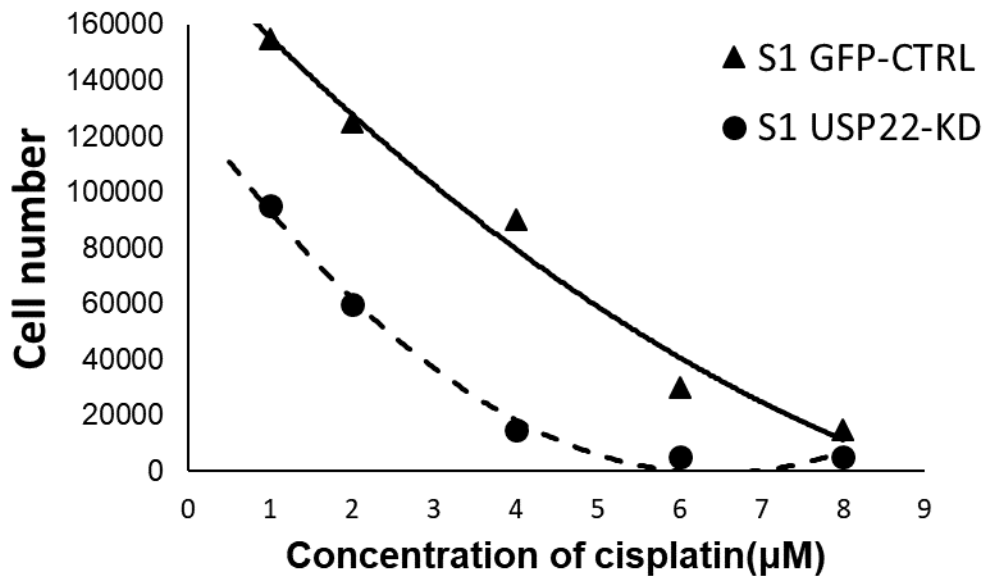

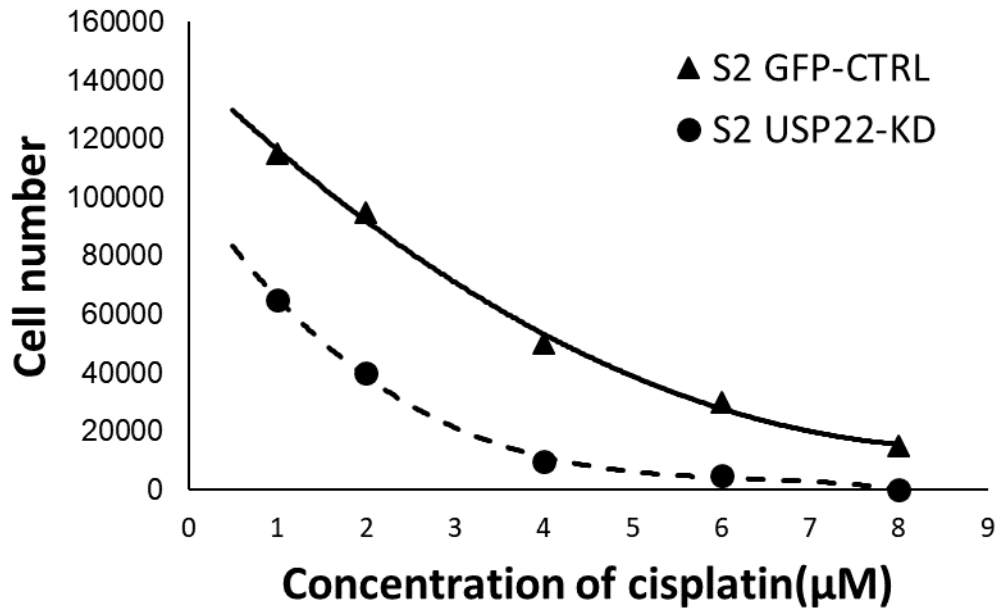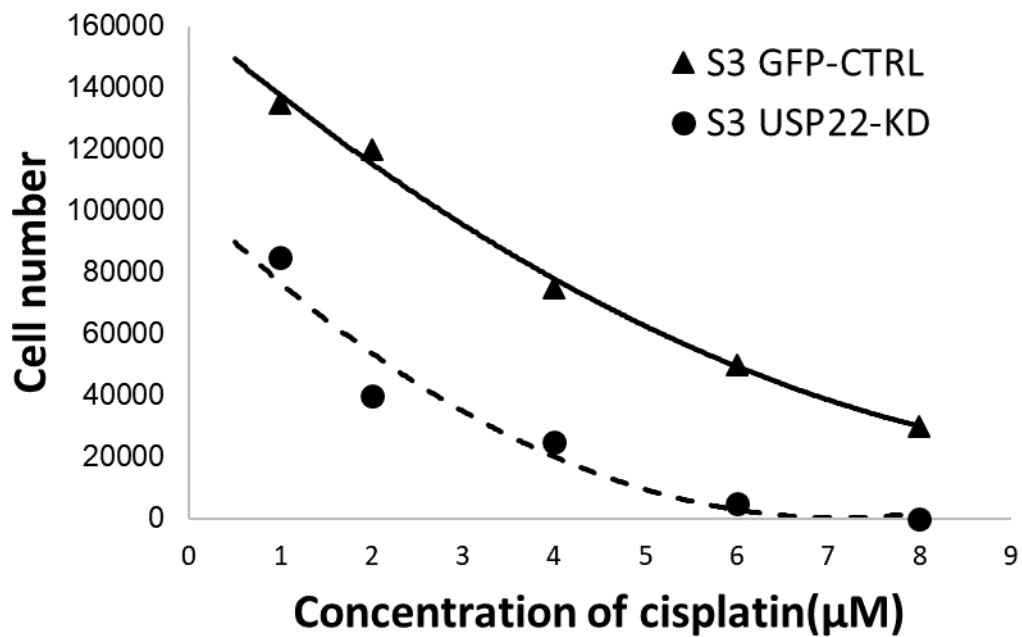

**B:** With another USP22-shRNA, we can see the results were the same as the Figure 3B. The results showed that IC<sub>50</sub> of cisplatin for all three USP22-KD cancer cells were significantly decreased compared with GFP-CTRL control cancer cells (2.4 μM vs 5.5 μM for sample 1,  $P = 0.0054$ ; 1.5 μM vs 4.4 μM for sample 2,  $P = 0.0039$ ; 1.9 μM vs 6.0 μM for sample 3,  $P = 0.0020$ ).
