# Supplementary material
Source: PubMed Central journal article supplement (PMC6030467)
Supplement: NIHMS962873-supplement-3.pdf [file NIHMS962873-supplement-3.pdf]

**Figure S3**

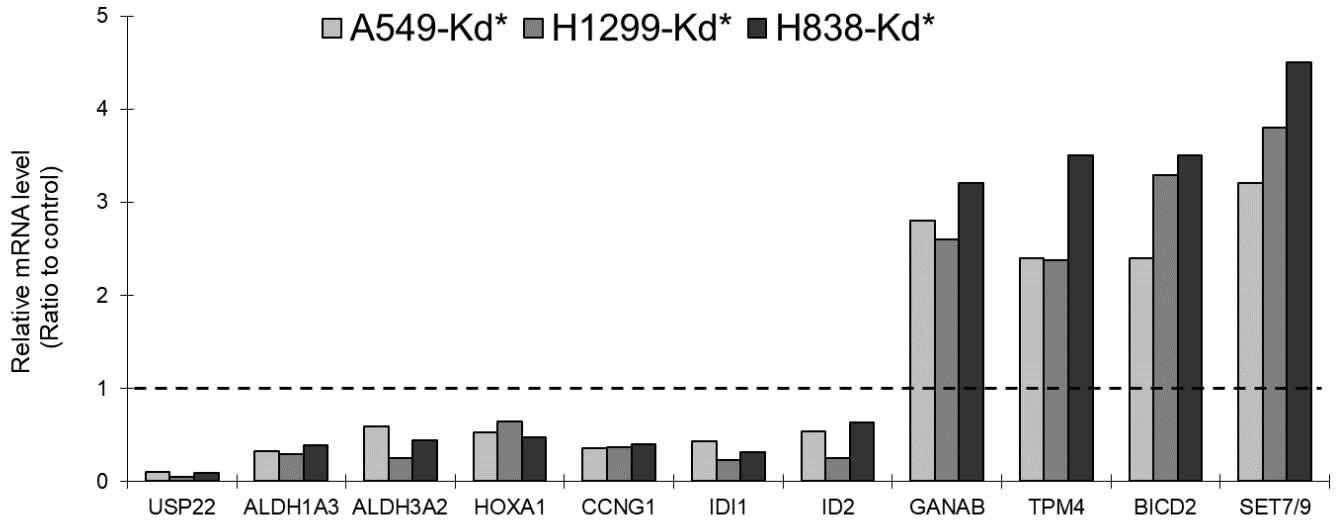

**Figure S3:** By qRT-PCR, we found that USP22 knockdown ubiquitously down-regulated ALDH1A3 mRNA expression in A549, H1299, and H838 lung cancer cells, indicating ALDH1A3 may be modified by USP22 at transcription level in an unidentified way.
