# Supplementary material
Source: PubMed Central journal article supplement (PMC6030467)
Supplement: NIHMS962873-supplement-4.pdf [file NIHMS962873-supplement-4.pdf]

Figure S4

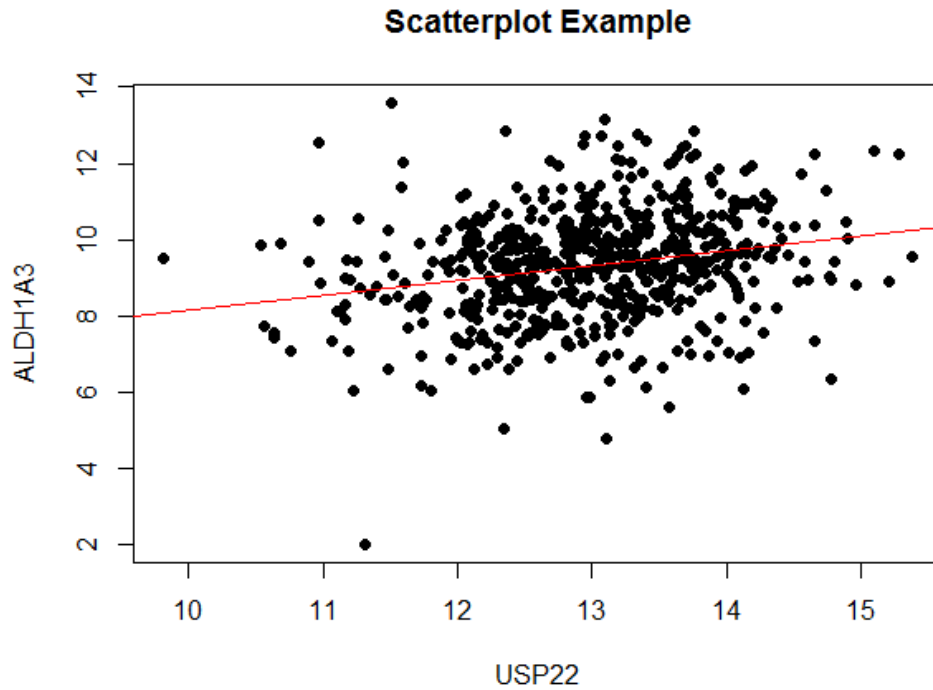

Figure S4. Correlation between the levels of USP22 mRNA with that of ALDH1A3 mRNA in lung Adenocarcinoma tissues from TCGA portal. The statistical analysis shows that the level of USP22 mRNA trends to positively correlate with level of ALDH1A3 mRNA (N = 592,  $P = 5.9e-09$ ,  $R^2 = 0.155$ ). X-axis is for the normalized USP22 mRNA level, Y-axis is for the normalized ALDH1A3 mRNA level.
