# Supplementary material
Source: PubMed Central journal article supplement (PMC6030467)
Supplement: NIHMS962873-supplement-5.pdf [file NIHMS962873-supplement-5.pdf]

Figure S5

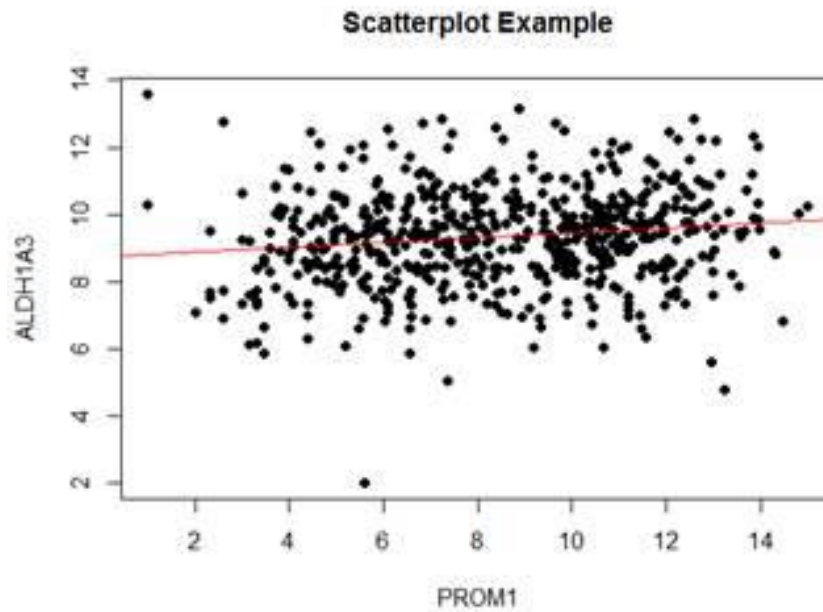

Figure S5. Correlation between the levels of CD133 (PROM1) mRNA with that of ALDH1A3 mRNA in lung adenocarcinoma tissues from TCGA portal. The statistical analysis shows that there is no correlation between the level of CD133 and ALDH1A3 (N = 592,  $P = 3.5 \cdot 10^{-4}$ ,  $R^2 = 0.0214$ ). X-axis is for the normalized CD133 mRNA level, Y-axis is for the normalized ALDH1A3 mRNA level.
